# Supplementary material for: Self-assembled 2D WSe2 thin films for photoelectrochemical hydrogen production
Source: PubMed Central journal article supplement (PMC4506493; doi:10.1038/ncomms8596), 2015-07-01
Supplement: ncomms8596-s1.pdf [file ncomms8596-s1.pdf]

## Supplementary Figures

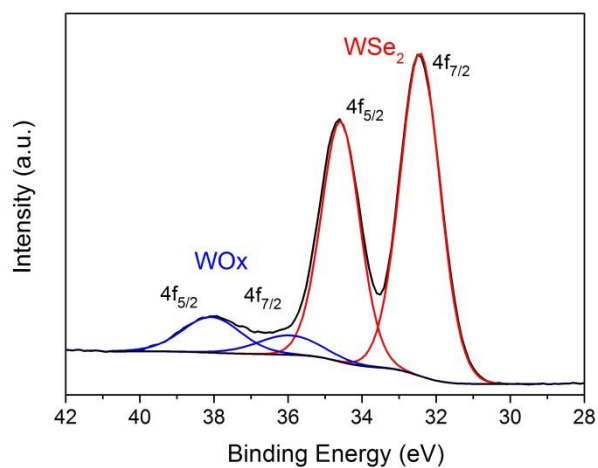

**Supplementary Figure 1.** The W core level XPS spectrum obtained on a SCSA deposited WSe<sub>2</sub> film.

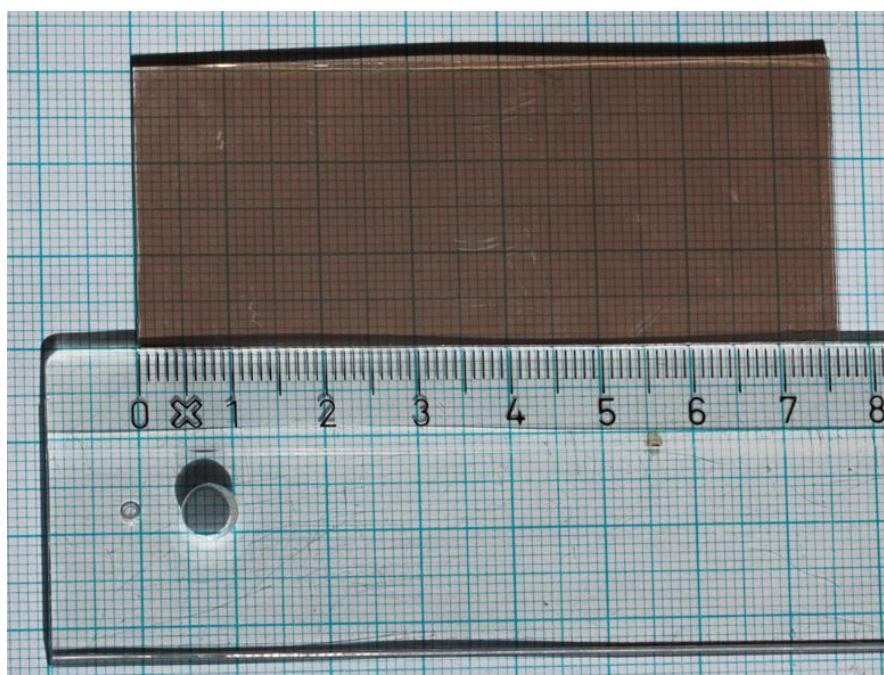

**Supplementary Figure 2.** A single flake layer WSe<sub>2</sub> film on a glass substrate prepared by the SCSA method. The area of the substrate is 22.5 cm<sup>2</sup>. A few scratches are noted on the film due to rough handling.

a) SCSA

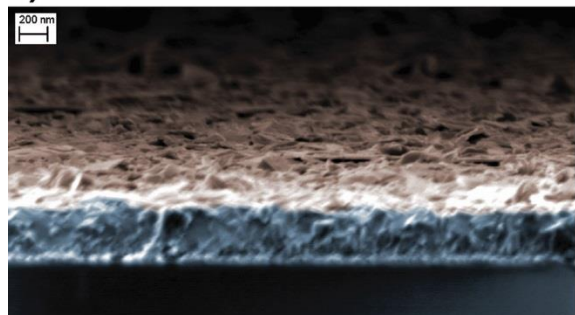

b) AC

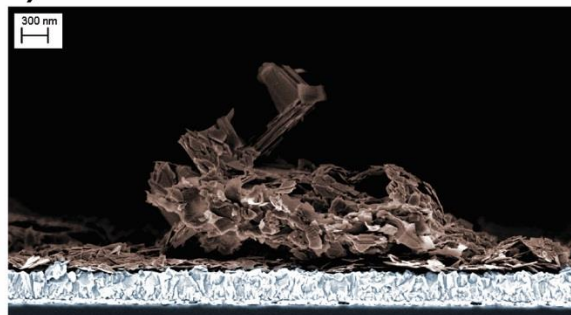

**Supplementary Figure 3.** Additional cross-sectional SEM images. Panel (a) shows a tilt-shift view (stage at  $3^\circ$ ) of the SCSA film to highlight the single-flake nature of the film and the slight roughness induced by the FTO surface. Panel (b) shows a representation of the large aggregates present in the AC film. The SEM images are coloured to highlight the F:SnO<sub>2</sub> substrate (blue) and the WSe<sub>2</sub> (brown).

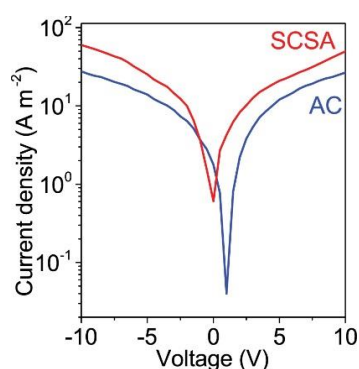

**Supplementary Figure 4.** The J-V data for the conductivity measurement on the 60  $\mu\text{m}$  channel device as described in the main text. We note the shift of the minimum current by 1 V in conductivity measurement of AC film, which can be attributed to capacitance created during the scan.

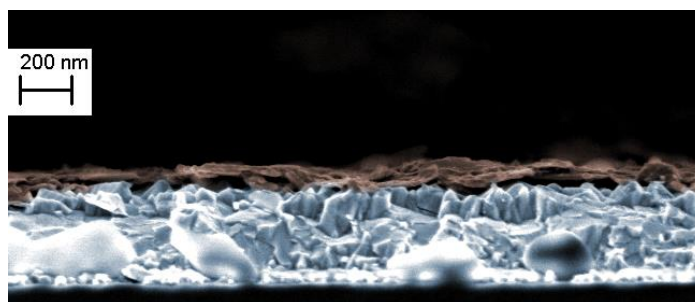

**Supplementary Figure 5.** Cross-sectional SEM image of a 2 layer SCSA WSe<sub>2</sub> film. A similar morphology is observed as in the 1 layer case (Figure 3c, main text)

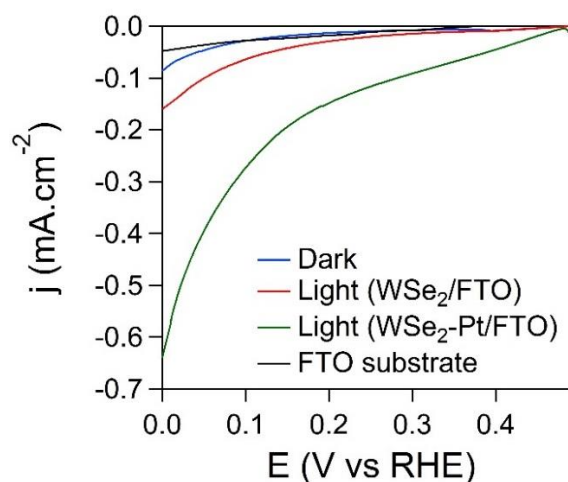

**Supplementary Figure 6.** Linear scanning voltammetry curves for the  $\text{WSe}_2$  under constant dark or illumination conditions. Scan rate  $10 \text{ mV s}^{-1}$  in  $1\text{M H}_2\text{SO}_4$  electrolyte.

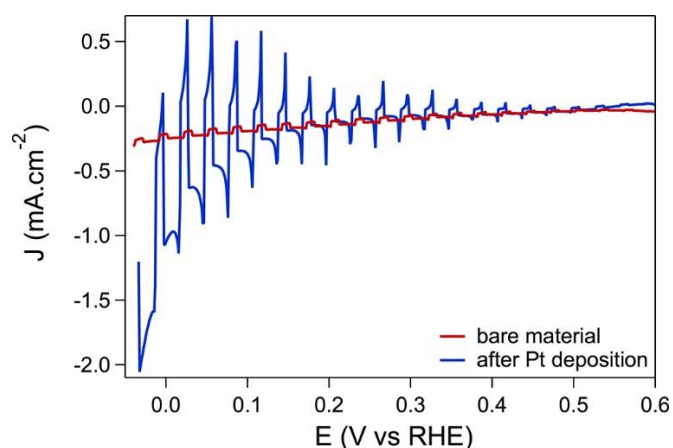

**Supplementary Figure 7.** Linear scanning voltammetry under intermittent illumination of the best performing 2-layer SCSA  $\text{WSe}_2$  film before (red curve) and after (blue curve) Pt deposition.

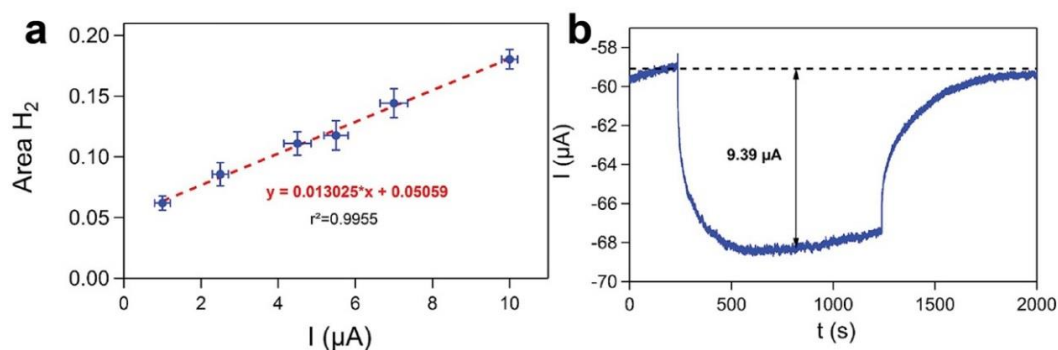

**Supplementary Figure 8.**  $\text{H}_2$  measurements and Faradaic efficiency calculation. (a) Shows the calibration curve constructed using Pt electrodes. (b) Shows the raw photocurrent data from the SCSA  $\text{WSe}_2$  photocathode measured.

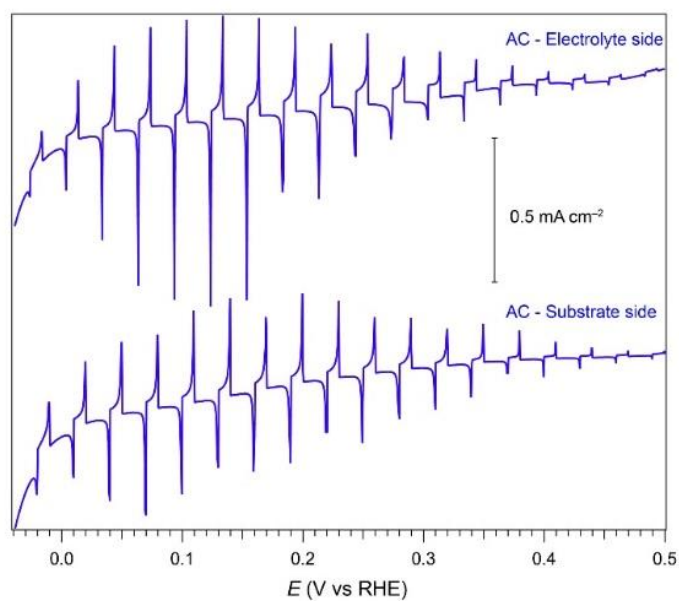

**Supplementary Figure 9.** Comparison of the linear scanning voltammetry under intermittent 1 sun illumination in 1M H<sub>2</sub>SO<sub>4</sub> electrolyte of the Pt-functionalized AC WSe<sub>2</sub> film.

### Supplementary Tables

**Supplementary Table 1.** Summary of conductivity measurements.

| Device geometry     |                    |  | Measured conductivity (S m <sup>-1</sup> ) |                      |
|---------------------|--------------------|--|--------------------------------------------|----------------------|
| Channel Length (μm) | Channel Width (mm) |  | SCSA film                                  | AC film              |
| 60                  | 1                  |  | 6.5×10 <sup>-4</sup>                       | 1.8×10 <sup>-4</sup> |
| 20                  | 3                  |  | 7.2×10 <sup>-4</sup>                       | 2.4×10 <sup>-4</sup> |
